# Supplementary material for: Ru(ii) polypyridyl complex-incorporated and folate-conjugated vehicle for cancer cell imaging and photoinduced inactivation
Source: Royal Society of Chemistry journal article supplement (doi:10.1039/c5an02650d), 2016-01-01
Supplement: c5an02650d3.pdf [file c5an02650d3.pdf]

## Support Information Materials

### Ru(II) polypyridyl complexes incorporated and folate-conjugated vehicle for cancer cell imaging and photoinduced inactivation

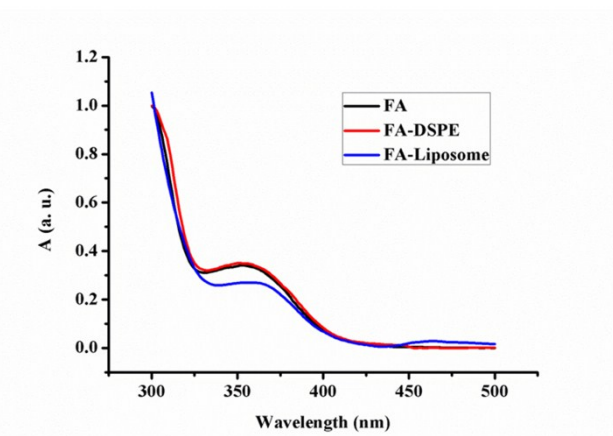

**Figure S1.** UV-Vis absorption spectra of free FA, FA-PEG2000-DSPE and FA-liposomes.

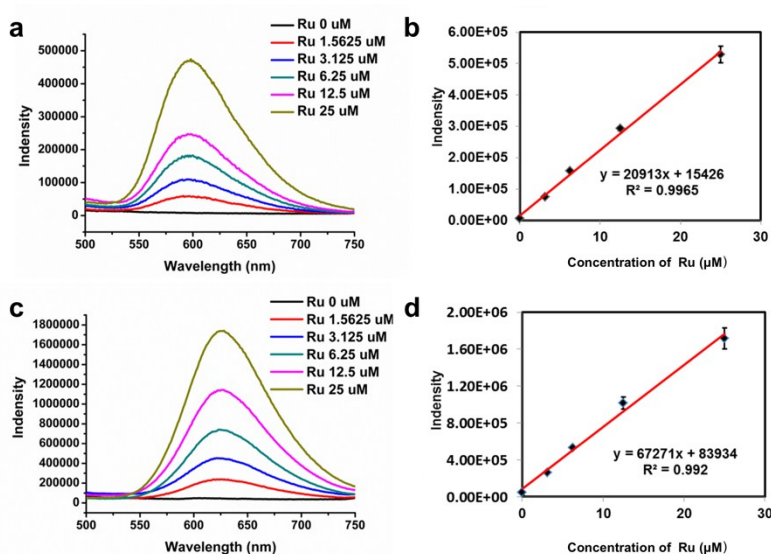

**Figure S2.** Luminescence emission spectra of (a) [Ru(phen)<sub>2</sub>(dppz)]<sup>2+</sup> in 0.01 M PBS and (b) [Ru(phen)<sub>2</sub>(dppz)]<sup>2+</sup> in 1% Triton X-100 (pH 7.4,  $\lambda_{ex} = 405$  nm). From up to down, the concentrations of [Ru(phen)<sub>2</sub>(dppz)]<sup>2+</sup> were 25, 12.5, 6.25, 3.125, 1.5625, 0  $\mu$ M, respectively. Standard curve of [Ru(phen)<sub>2</sub>(dppz)]<sup>2+</sup> linear relationship between the relative luminescence intensity enhancement and the concentrations of [Ru(phen)<sub>2</sub>(dppz)]<sup>2+</sup> in 0.01 M PBS (c) or in 1% Triton X-100 (d). Error bars were based on standard deviations of triplicated samples. It could be noticed that the emission maximum of [Ru(phen)<sub>2</sub>(dppz)]<sup>2+</sup> shifted to 625 nm when treated with Triton X-100, the addition of the neutral surfactant to complex resulted in a shift in their emission maxima, which may be due to the microencapsulation of the ruthenium(II) complexes into the micellar medium, resulting in a change in the microenvironment experienced by the ruthenium(II) complexes. <sup>[1-2]</sup>

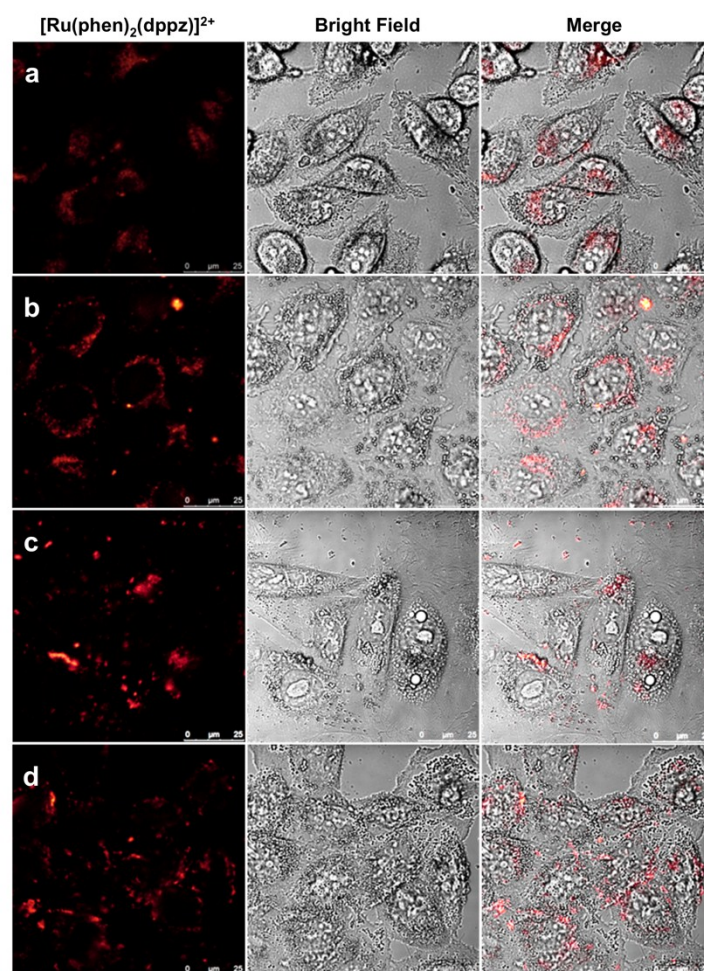

**Figure S3.** Confocal laser scanning microscopy images of  $[\text{Ru}(\text{phen})_2(\text{dppz})]^{2+}$  in FR<sup>+</sup> HeLa (a), HeLa (b), A549 (c) and MCF-7 (d) cells. The cells were incubated with 100  $\mu\text{M}$   $[\text{Ru}(\text{phen})_2(\text{dppz})]^{2+}$  for 24 h, and then free  $[\text{Ru}(\text{phen})_2(\text{dppz})]^{2+}$  was washed away three times with 0.01 M PBS before imaging. The  $[\text{Ru}(\text{phen})_2(\text{dppz})]^{2+}$  were excited using a 488 nm laser, emitting 600-650 nm luminescence (scale bar: 25 $\mu\text{m}$ ).

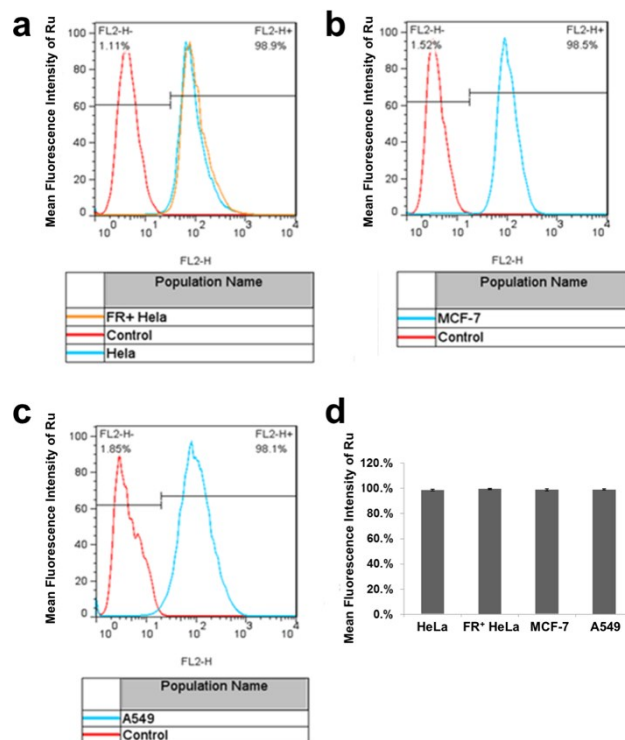

**Figure S4.** Flow cytometry profiles of luminescence from  $[\text{Ru}(\text{phen})_2(\text{dppz})]^{2+}$  that uptaken in HeLa (a), MCF-7 (b) and A549 (c) cells. The cells were incubated with  $100 \mu\text{M}$   $[\text{Ru}(\text{phen})_2(\text{dppz})]^{2+}$  for 24 h before flow cytometry assay. (d) Percentage of luminescence cells calculated from a, b, c. The data from three independent experiments were normalized as a percentage of the control.

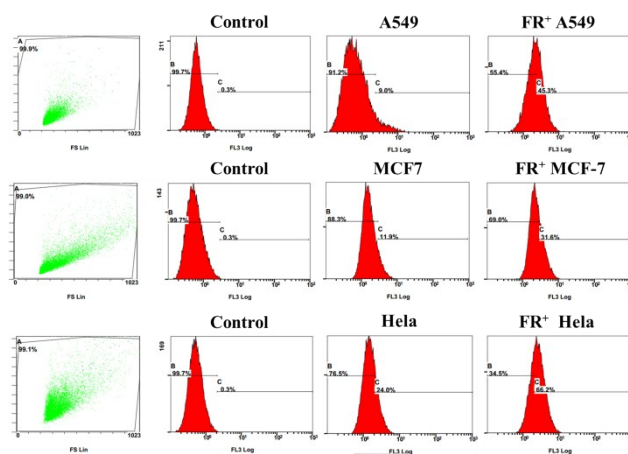

**Figure S5.** Flow cytometry profiles of luminescence from f-LP-Ru in HeLa, MCF-7 and A549 cells. The cells were incubated with 1mM f-LP-Ru for 24 h before flow cytometry assay.

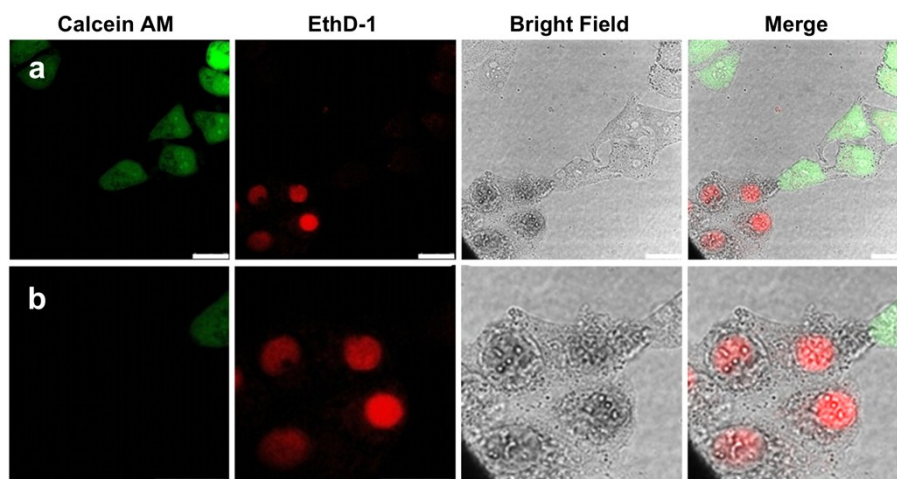

**Figure S6.** The LIVE/DEAD Viability/Cytotoxicity Assay of HeLa treated with  $[\text{Ru}(\text{phen})_2(\text{dppz})]^{2+}$ . (a)

After incubation with  $[\text{Ru}(\text{phen})_2(\text{dppz})]^{2+}$  for 24 h, cells were rinsed with PBS for three times and irradiated with the laser. The cells were then stained by a mixture of calcein-AM and EthD-1 solution for 20 min. The dead cells were examined under a confocal laser scanning microscope. Calcein-AM was excited using a 488 nm laser, emitting 500-520 nm fluorescence, EthD-1 was excited using a 543 nm laser, emitting 650-670 nm fluorescence. (b) Magnification view of (a).

## References

- 1 E. Rajkumar, P. M. Mareeswaran and S. Rajagopal. *Photochem. Photobiol. Sci.* 2014, **13**, 1261-1269.
- 2 R. Sangiliapillai, R. Arumugam, R. Eswaranc and Rajagopal Seenivasanb. *Luminescence* 2015, DOI: 10.1002/bio.2917
